# Supplementary material for: Bone Marrow Aspirate Concentrate versus Human Umbilical Cord Blood-Derived Mesenchymal Stem Cells for Combined Cartilage Regeneration Procedure in Patients Undergoing High Tibial Osteotomy: A Systematic Review and Meta-Analysis
Source: Medicina (Kaunas). 2023 Mar 22;59(3):634. doi: 10.3390/medicina59030634 (PMC10059261; doi:10.3390/medicina59030634)
Supplement: Supplementary file 1 [file medicina-59-00634-s001.zip › Supplemental Table S1.pdf]

**Table S1.** Keywords and search details.

| DB     | Search | Keywords / Search details                                                                                                                                                                                                                                                                                                                                                                                                                                                                                                          |
|--------|--------|------------------------------------------------------------------------------------------------------------------------------------------------------------------------------------------------------------------------------------------------------------------------------------------------------------------------------------------------------------------------------------------------------------------------------------------------------------------------------------------------------------------------------------|
| PubMed | #1     | "Osteoarthritis, Knee"[Mesh]                                                                                                                                                                                                                                                                                                                                                                                                                                                                                                       |
|        | #2     | "Osteoarthritis, Knee"[TW] OR "Knee Osteoarthritides"[TW] OR "Knee Osteoarthritis"[TW] OR "Osteoarthritis of Knee"[TW] OR "Osteoarthritis of the Knee"[TW] OR "knee arthritis"[TW] OR "arthrosis, knee"[TW] OR "femorotibial arthrosis"[TW] OR "gonarthrosis"[TW] OR "knee arthrosis"[TW] OR "knee joint arthrosis"[TW] OR "knee joint osteoarthritis"[TW] OR "knee osteo-arthritis"[TW] OR "knee osteo-arthrosis"[TW] OR "knee osteoarthrosis"[TW] OR "osteoarthrosis, knee"[TW]                                                  |
|        | #3     | "osteotomy"[Mesh] OR "osteotomy"[TW] OR "Osteotomies"[TW] OR "corrective osteotomy"[TW]                                                                                                                                                                                                                                                                                                                                                                                                                                            |
|        | #4     | "high tibial osteotomy"[TW] OR "high (proximal) tibial osteotomy"[TW] OR "high tibia osteotomy"[TW] OR "high tibia osteotomy"[TW] OR "high tibial osteotomy procedure"[TW] OR "high tibial osteotomy surgery"[TW] OR "high tibial osteotomy techniques"[TW] OR "HTO procedure"[TW] OR "HTO surgery"[TW] OR "HTO technique"[TW] OR "proximal tibia osteotomy"[TW] OR "proximal tibial osteotomy"[TW] OR "tibia proximal corrective osteotomy"[TW] OR "tibia proximal osteotomy"[TW] OR "tibial proximal osteotomy"[TW] OR "HTO"[TW] |
|        | #5     | <b>(#1 OR #2) AND (#3 OR #4)</b>                                                                                                                                                                                                                                                                                                                                                                                                                                                                                                   |
|        | #6     | "Umbilical Cord"[Mesh] OR "Umbilical Cord"[TW] OR "Umbilical Cords"[TW]                                                                                                                                                                                                                                                                                                                                                                                                                                                            |
|        | #7     | "Mesenchymal Stem Cells"[Mesh] OR "Mesenchymal Stem Cells"[TW] OR "Mesenchymal Stem Cell"[TW]                                                                                                                                                                                                                                                                                                                                                                                                                                      |
|        | #8     | "UC-mesenchymal stem cells"[TW] OR "UC-MSC (umbilical cord mesenchymal stem cell)"[TW] OR "umbilical cord (UC) -mesenchymal stem cells (MSC)"[TW] OR "umbilical cord mesenchymal stem cells"[TW] OR "umbilical cord MSC"[TW] OR "umbilical cord MSC (UC-MSC)"[TW] OR "umbilical cord-derived mesenchymal stem cell"[TW] OR "umbilical cord-derived mesenchymal stem cells"[TW]                                                                                                                                                     |
|        | #9     | "umbilical cord blood-derived mesenchymal stem cell"[TW] OR "UCB-MSC"[TW] OR "hUCB-MSC"[TW]                                                                                                                                                                                                                                                                                                                                                                                                                                        |

|  |     |                                                                                                                                                                                                                                                                                                        |
|--|-----|--------------------------------------------------------------------------------------------------------------------------------------------------------------------------------------------------------------------------------------------------------------------------------------------------------|
|  | #10 | "bone marrow aspirate concentrate"[TW] OR "bone marrow aspirate"[TW] OR "BMAC"[TW] OR "bone marrow aspiration concentrate"[TW] OR "bone marrow aspiration"[TW] OR (bone[TW] AND marrow[TW] AND aspirate[TW]) OR (("bone marrow"[Mesh] OR "bone marrow"[TW]) AND ("aspirate"[TW] OR "concentrate"[TW])) |
|  | #11 | (#6 AND #7) OR #8 OR #9 OR #10                                                                                                                                                                                                                                                                         |
|  | #12 | #5 AND #11                                                                                                                                                                                                                                                                                             |

| DB     | Search | Keywords / Search details                                                                                                                                                                                                                                                                                                                                                                                                                                                                                                                                                                                         |
|--------|--------|-------------------------------------------------------------------------------------------------------------------------------------------------------------------------------------------------------------------------------------------------------------------------------------------------------------------------------------------------------------------------------------------------------------------------------------------------------------------------------------------------------------------------------------------------------------------------------------------------------------------|
| EMBASE | #1     | "knee osteoarthritis"/exp                                                                                                                                                                                                                                                                                                                                                                                                                                                                                                                                                                                         |
|        | #2     | "Osteoarthritis, Knee":ti,ab,kw,de OR "Knee Osteoarthritides":ti,ab,kw,de OR "Knee Osteoarthritis":ti,ab,kw,de OR "Osteoarthritis of Knee":ti,ab,kw,de OR "Osteoarthritis of the Knee":ti,ab,kw,de OR "knee arthritis":ti,ab,kw,de OR "arthrosis, knee":ti,ab,kw,de OR "femorotibial arthrosis":ti,ab,kw,de OR "gonarthrosis":ti,ab,kw,de OR "knee arthrosis":ti,ab,kw,de OR "knee joint arthrosis":ti,ab,kw,de OR "knee joint osteoarthritis":ti,ab,kw,de OR "knee osteo-arthritis":ti,ab,kw,de OR "knee osteo-arthrosis":ti,ab,kw,de OR "knee osteoarthrosis":ti,ab,kw,de OR "osteoarthrosis, knee":ti,ab,kw,de |
|        | #3     | "osteotomy"/exp OR "osteotomy":ti,ab,kw,de OR "Osteotomies":ti,ab,kw,de OR "corrective osteotomy":ti,ab,kw,de                                                                                                                                                                                                                                                                                                                                                                                                                                                                                                     |

|     |                                                                                                                                                                                                                                                                                                                                                                                                                                                                                                                                                                                                                                                                                                           |
|-----|-----------------------------------------------------------------------------------------------------------------------------------------------------------------------------------------------------------------------------------------------------------------------------------------------------------------------------------------------------------------------------------------------------------------------------------------------------------------------------------------------------------------------------------------------------------------------------------------------------------------------------------------------------------------------------------------------------------|
| #4  | "high tibial osteotomy":ti,ab,kw,de OR "high (proximal) tibial osteotomy":ti,ab,kw,de OR "high tibia osteotomy":ti,ab,kw,de OR "high tibia osteotomy":ti,ab,kw,de OR "high tibial osteotomy":ti,ab,kw,de OR "high tibial osteotomy procedure":ti,ab,kw,de OR "high tibial osteotomy surgery":ti,ab,kw,de OR "high tibial osteotomy techniques":ti,ab,kw,de OR "HTO procedure":ti,ab,kw,de OR "HTO surgery":ti,ab,kw,de OR "HTO technique":ti,ab,kw,de OR "proximal tibia osteotomy":ti,ab,kw,de OR "proximal tibial osteotomy":ti,ab,kw,de OR "tibia proximal corrective osteotomy":ti,ab,kw,de OR "tibia proximal osteotomy":ti,ab,kw,de OR "tibial proximal osteotomy":ti,ab,kw,de OR "HTO":ti,ab,kw,de |
| #5  | <b>(#1 OR #2) AND (#3 OR #4)</b>                                                                                                                                                                                                                                                                                                                                                                                                                                                                                                                                                                                                                                                                          |
| #6  | "umbilical cord"/exp OR "Umbilical Cord":ti,ab,kw,de OR "Umbilical Cords":ti,ab,kw,de                                                                                                                                                                                                                                                                                                                                                                                                                                                                                                                                                                                                                     |
| #7  | "mesenchymal stem cell"/exp OR "Mesenchymal Stem Cells":ti,ab,kw,de OR "Mesenchymal Stem Cell":ti,ab,kw,de                                                                                                                                                                                                                                                                                                                                                                                                                                                                                                                                                                                                |
| #8  | "UC-mesenchymal stem cells":ti,ab,kw,de OR "UC-MSC (umbilical cord mesenchymal stem cell)":ti,ab,kw,de OR "umbilical cord (UC) -mesenchymal stem cells (MSC)":ti,ab,kw,de OR "umbilical cord mesenchymal stem cells":ti,ab,kw,de OR "umbilical cord MSC":ti,ab,kw,de OR "umbilical cord MSC (UC-MSC)":ti,ab,kw,de OR "umbilical cord-derived mesenchymal stem cell":ti,ab,kw,de OR "umbilical cord-derived mesenchymal stem cells":ti,ab,kw,de                                                                                                                                                                                                                                                            |
| #9  | "umbilical cord blood-derived mesenchymal stem cell":ti,ab,kw,de OR "UCB-MSC":ti,ab,kw,de OR "hUCB-MSC":ti,ab,kw,de                                                                                                                                                                                                                                                                                                                                                                                                                                                                                                                                                                                       |
| #10 | "bone marrow aspirate concentrate":ti,ab,kw,de OR "bone marrow aspirate":ti,ab,kw,de OR "BMAC":ti,ab,kw,de OR "bone marrow aspiration concentrate":ti,ab,kw,de OR "bone marrow aspiration":ti,ab,kw,de OR (bone:ti,ab,kw,de AND marrow:ti,ab,kw,de AND aspirate:ti,ab,kw,de) OR (("bone marrow"/exp OR "bone marrow":ti,ab,kw,de) AND ("aspirate":ti,ab,kw,de OR "concentrate":ti,ab,kw,de))                                                                                                                                                                                                                                                                                                              |
| #11 | <b>(#6 AND #7) OR #8 OR #9 OR #10</b>                                                                                                                                                                                                                                                                                                                                                                                                                                                                                                                                                                                                                                                                     |
| #12 | <b>#5 AND #11</b>                                                                                                                                                                                                                                                                                                                                                                                                                                                                                                                                                                                                                                                                                         |

| DB               | Search | Keywords / Search details                                                                                                                                                                                                                                                                                                                                                                                                                                                                                                                                                                                                                              |
|------------------|--------|--------------------------------------------------------------------------------------------------------------------------------------------------------------------------------------------------------------------------------------------------------------------------------------------------------------------------------------------------------------------------------------------------------------------------------------------------------------------------------------------------------------------------------------------------------------------------------------------------------------------------------------------------------|
| Cochrane Library | #1     | [mh "Osteoarthritis, Knee"]                                                                                                                                                                                                                                                                                                                                                                                                                                                                                                                                                                                                                            |
|                  | #2     | "Osteoarthritis, Knee":ti,ab,kw OR "Knee Osteoarthritides":ti,ab,kw OR "Knee Osteoarthritis":ti,ab,kw OR "Osteoarthritis of Knee":ti,ab,kw OR "Osteoarthritis of the Knee":ti,ab,kw OR "knee arthritis":ti,ab,kw OR "arthrosis, knee":ti,ab,kw OR "femorotibial arthrosis":ti,ab,kw OR "gonarthrosis":ti,ab,kw OR "knee arthrosis":ti,ab,kw OR "knee joint arthrosis":ti,ab,kw OR "knee joint osteoarthritis":ti,ab,kw OR "knee osteoarthritis":ti,ab,kw OR "knee osteo-arthrosis":ti,ab,kw OR "knee osteoarthrosis":ti,ab,kw OR "osteoarthrosis, knee":ti,ab,kw                                                                                       |
|                  | #3     | [mh "osteotomy"] OR "osteotomy":ti,ab,kw OR "Osteotomies":ti,ab,kw OR "corrective osteotomy":ti,ab,kw                                                                                                                                                                                                                                                                                                                                                                                                                                                                                                                                                  |
|                  | #4     | "high tibial osteotomy":ti,ab,kw OR "high (proximal) tibial osteotomy":ti,ab,kw OR "high tibia osteotomy":ti,ab,kw OR "high tibia osteotomy":ti,ab,kw OR "high tibial osteotomy":ti,ab,kw OR "high tibial osteotomy procedure":ti,ab,kw OR "high tibial osteotomy surgery":ti,ab,kw OR "high tibial osteotomy techniques":ti,ab,kw OR "HTO procedure":ti,ab,kw OR "HTO surgery":ti,ab,kw OR "HTO technique":ti,ab,kw OR "proximal tibia osteotomy":ti,ab,kw OR "proximal tibial osteotomy":ti,ab,kw OR "tibia proximal corrective osteotomy":ti,ab,kw OR "tibia proximal osteotomy":ti,ab,kw OR "tibial proximal osteotomy":ti,ab,kw OR "HTO":ti,ab,kw |
|                  | #5     | <b>(#1 OR #2) AND (#3 OR #4)</b>                                                                                                                                                                                                                                                                                                                                                                                                                                                                                                                                                                                                                       |
|                  | #6     | [mh "Umbilical Cord"] OR "Umbilical Cord":ti,ab,kw OR "Umbilical Cords":ti,ab,kw                                                                                                                                                                                                                                                                                                                                                                                                                                                                                                                                                                       |
|                  | #7     | [mh "Mesenchymal Stem Cells"] OR "Mesenchymal Stem Cells":ti,ab,kw OR "Mesenchymal Stem Cell":ti,ab,kw                                                                                                                                                                                                                                                                                                                                                                                                                                                                                                                                                 |

|     |                                                                                                                                                                                                                                                                                                                                                                                                                        |
|-----|------------------------------------------------------------------------------------------------------------------------------------------------------------------------------------------------------------------------------------------------------------------------------------------------------------------------------------------------------------------------------------------------------------------------|
| #8  | "UC-mesenchymal stem cells":ti,ab,kw OR "UC-MSC (umbilical cord mesenchymal stem cell)":ti,ab,kw OR "umbilical cord (UC) -mesenchymal stem cells (MSC)":ti,ab,kw OR "umbilical cord mesenchymal stem cells":ti,ab,kw OR "umbilical cord MSC":ti,ab,kw OR "umbilical cord MSC (UC-MSC)":ti,ab,kw OR "umbilical cord-derived mesenchymal stem cell":ti,ab,kw OR "umbilical cord-derived mesenchymal stem cells":ti,ab,kw |
| #9  | "umbilical cord blood-derived mesenchymal stem cell":ti,ab,kw OR "UCB-MSC":ti,ab,kw OR "hUCB-MSC":ti,ab,kw                                                                                                                                                                                                                                                                                                             |
| #10 | "bone marrow aspirate concentrate":ti,ab,kw OR "bone marrow aspirate":ti,ab,kw OR "BMAC":ti,ab,kw OR "bone marrow aspiration concentrate":ti,ab,kw OR "bone marrow aspiration":ti,ab,kw OR (bone:ti,ab,kw AND marrow:ti,ab,kw AND aspirate:ti,ab,kw) OR (([mh "bone marrow"] OR "bone marrow":ti,ab,kw) AND ("aspirate":ti,ab,kw OR "concentrate":ti,ab,kw))                                                           |
| #11 | (#6 AND #7) OR #8 OR #9 OR #10                                                                                                                                                                                                                                                                                                                                                                                         |
| #12 | #5 AND #11                                                                                                                                                                                                                                                                                                                                                                                                             |
