# Supplementary material for: Bone Marrow Aspirate Concentrate versus Human Umbilical Cord Blood-Derived Mesenchymal Stem Cells for Combined Cartilage Regeneration Procedure in Patients Undergoing High Tibial Osteotomy: A Systematic Review and Meta-Analysis
Source: Medicina (Kaunas). 2023 Mar 22;59(3):634. doi: 10.3390/medicina59030634 (PMC10059261; doi:10.3390/medicina59030634)
Supplement: Supplementary file 1 [file medicina-59-00634-s001.zip › Supplemental Table S2.pdf]

**Table S2.** Risk-of-bias assessment performed using the MINORS score.

| Study             |                                                      | Jin, 2021 | Lee, 2021 | Yang, 2022 | Cavallo, 2018 | Song, 2020 | Song, 2020b | Chung,2021 |
|-------------------|------------------------------------------------------|-----------|-----------|------------|---------------|------------|-------------|------------|
| Level of evidence |                                                      | III       | III       | III        | IV            | IV         | IV          | IV         |
| 1                 | A clearly stated aim                                 | 2         | 2         | 2          | 2             | 2          | 2           | 2          |
| 2                 | Inclusion of consecutive patients                    | 2         | 1         | 1          | 0             | 1          | 1           | 2          |
| 3                 | Prospective collection of data                       | 0         | 0         | 0          | 1             | 1          | 1           | 1          |
| 4                 | Endpoints appropriate to the aim of the study        | 2         | 2         | 2          | 2             | 2          | 2           | 2          |
| 5                 | Unbiased assessment of the study endpoint            | 1         | 0         | 0          | 0             | 1          | 1           | 1          |
| 6                 | Follow-up period appropriate to the aim of the study | 1         | 1         | 1          | 1             | 1          | 1           | 1          |
| 7                 | Loss to follow up less than 5%                       | 1         | 2         | 1          | 0             | 1          | 2           | 2          |
| 8                 | Prospective calculation of the study size            | 2         | 0         | 0          | 0             | 0          | 0           | 0          |
| 9                 | An adequate control group                            | 2         | 0         | 0          | -             | -          | -           | -          |
| 10                | Contemporary groups                                  | 2         | 2         | 2          | -             | -          | -           | -          |
| 11                | Baseline equivalence of groups                       | 1         | 1         | 2          | -             | -          | -           | -          |
| 12                | Adequate statistical analyses                        | 2         | 2         | 2          | -             | -          | -           | -          |
| Total score       |                                                      | 18        | 13        | 13         | 6             | 9          | 10          | 11         |

MINORS, Methodological index for non-randomized studies
